# Supplementary material for: A bovine milk-derived peptide ameliorates pancreatic β-cell dedifferentiation through PI3K/Akt/FOXO1 signaling in type 2 diabetes
Source: Royal Society of Chemistry journal article supplement (doi:10.1039/d3fo01330h), 2023-01-01
Supplement: d3fo01330h1.pdf [file d3fo01330h1.pdf]

1

2

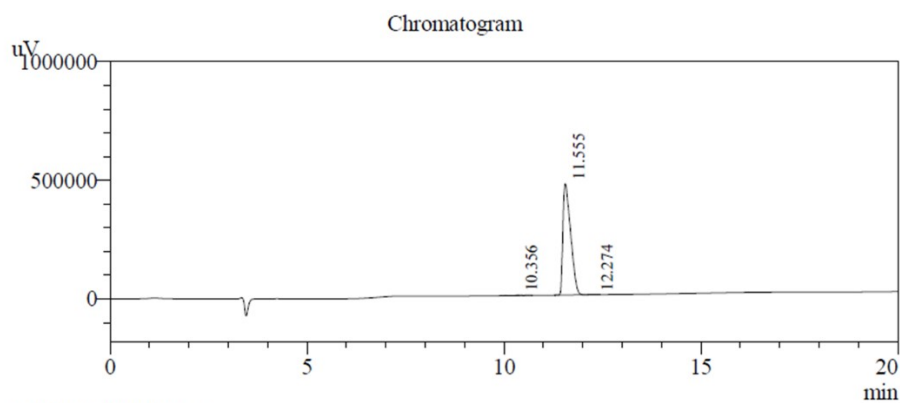

1 Det.A Ch1 / 214nm

PeakTable

Detector A Ch1 214nm

| Peak# | Ret. Time | Area    | Height | Area %  | Height % |
|-------|-----------|---------|--------|---------|----------|
| 1     | 10.356    | 23383   | 1921   | 0.363   | 0.406    |
| 2     | 11.555    | 6403489 | 470935 | 99.514  | 99.436   |
| 3     | 12.274    | 7884    | 750    | 0.123   | 0.158    |
| Total |           | 6434756 | 473606 | 100.000 | 100.000  |

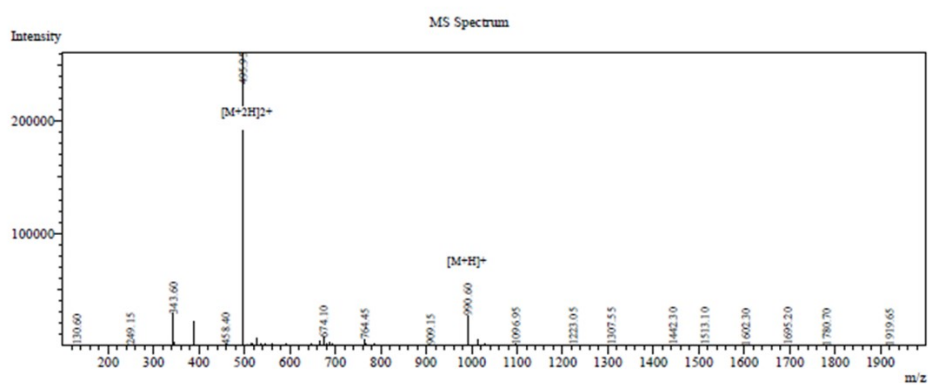

3

4 **Supplementary Fig. 1.** HPLC analysis and MS spectrum of LGP9.

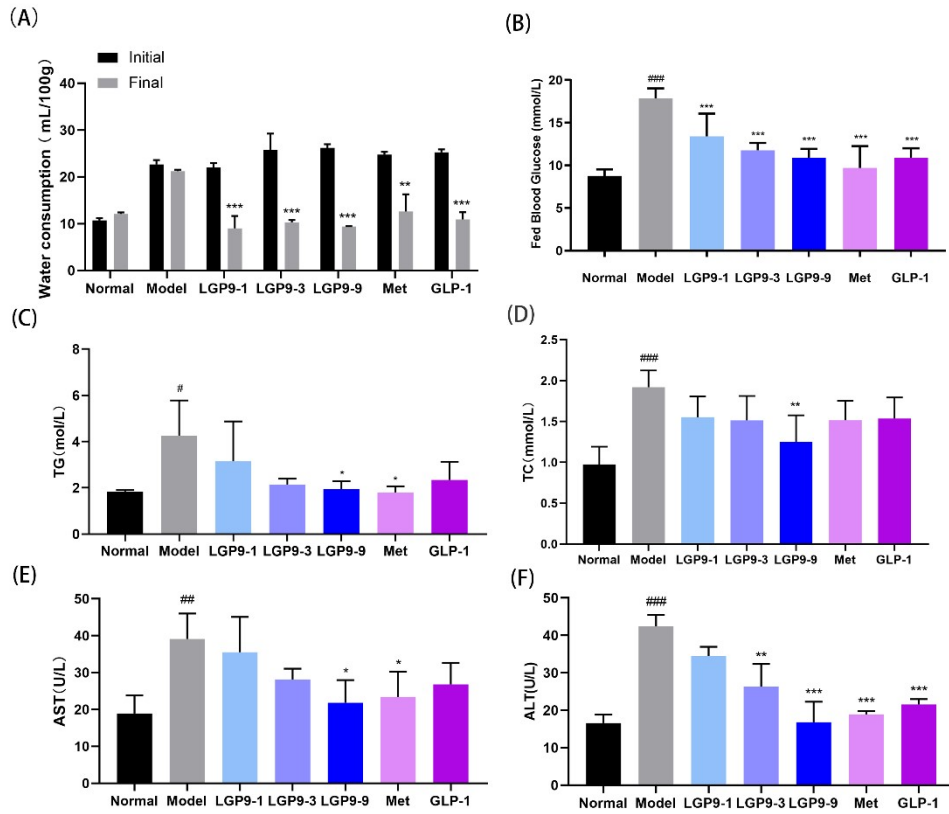

5  
6 **Supplementary Fig. 2.** The effects of LGP9 on water consumption and serum lipid levels in HFD-  
7 STZ-induced T2D mice. Water consumption (A) was measured on the first and final day before  
8 sacrifice. Fed blood glucose (B) was measured before sacrifice. Serum TG level (C), serum TC level  
9 (D), serum AST level (E), and serum ALT level (F) were measured after sacrifice. Values are mean  
10  $\pm$  s.d. (n=6-8), #p<0.05, ##p<0.01, ###p<0.001 vs. the normal group. \*p<0.05, \*\*p<0.01, \*\*\*p<0.001  
11 vs. the model group.  
12

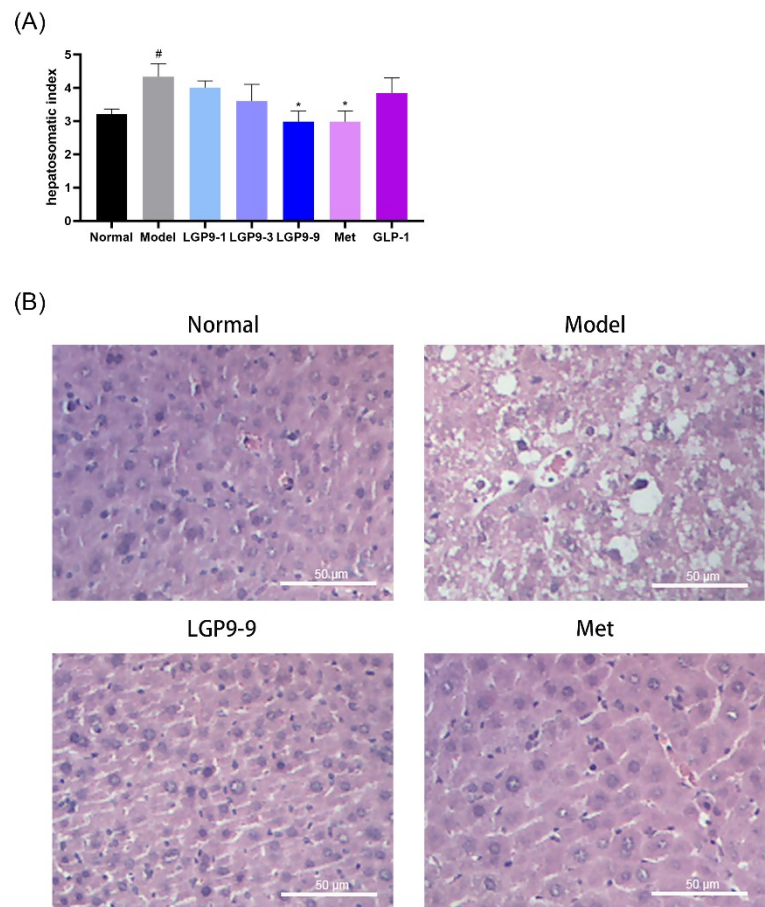

13

14 **Supplementary Fig. 3.** The effect of LGP9 on the liver of HFD-STZ-induced T2D mice. Liver  
 15 index (A) was measured after sacrifice. (B) H&E staining of the pancreas sections (400×). Values  
 16 are mean ± s.d. (n=6-8), <sup>#</sup>p<0.05vs. the normal group. <sup>\*</sup>p<0.05 vs. the model group.

17
