# Supplementary material for: A bovine milk-derived peptide ameliorates pancreatic β-cell dedifferentiation through PI3K/Akt/FOXO1 signaling in type 2 diabetes
Source: Royal Society of Chemistry journal article supplement (doi:10.1039/d3fo01330h), 2023-01-01

**Fig. 4.** The effect of LGP9 on the pancreas of HFD-STZ-induced T2D mice.

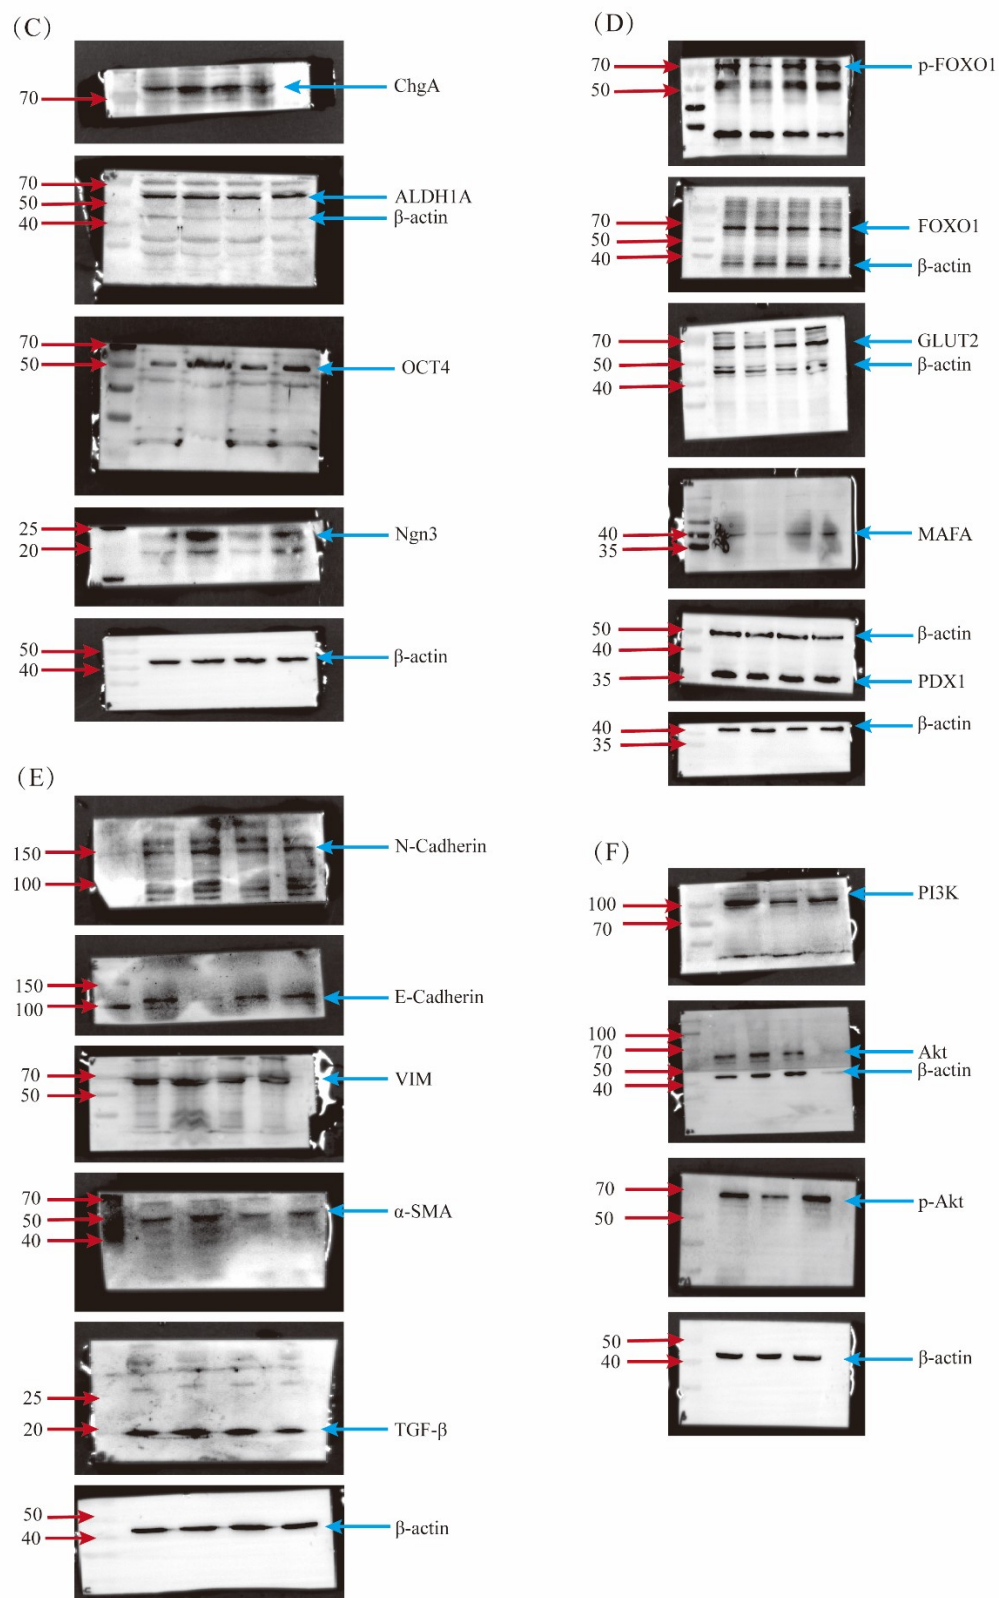

Fig. 5. The effect of LGP9 on  $\beta$ -cell dedifferentiation of IIG-treated Rin-m5f cells.

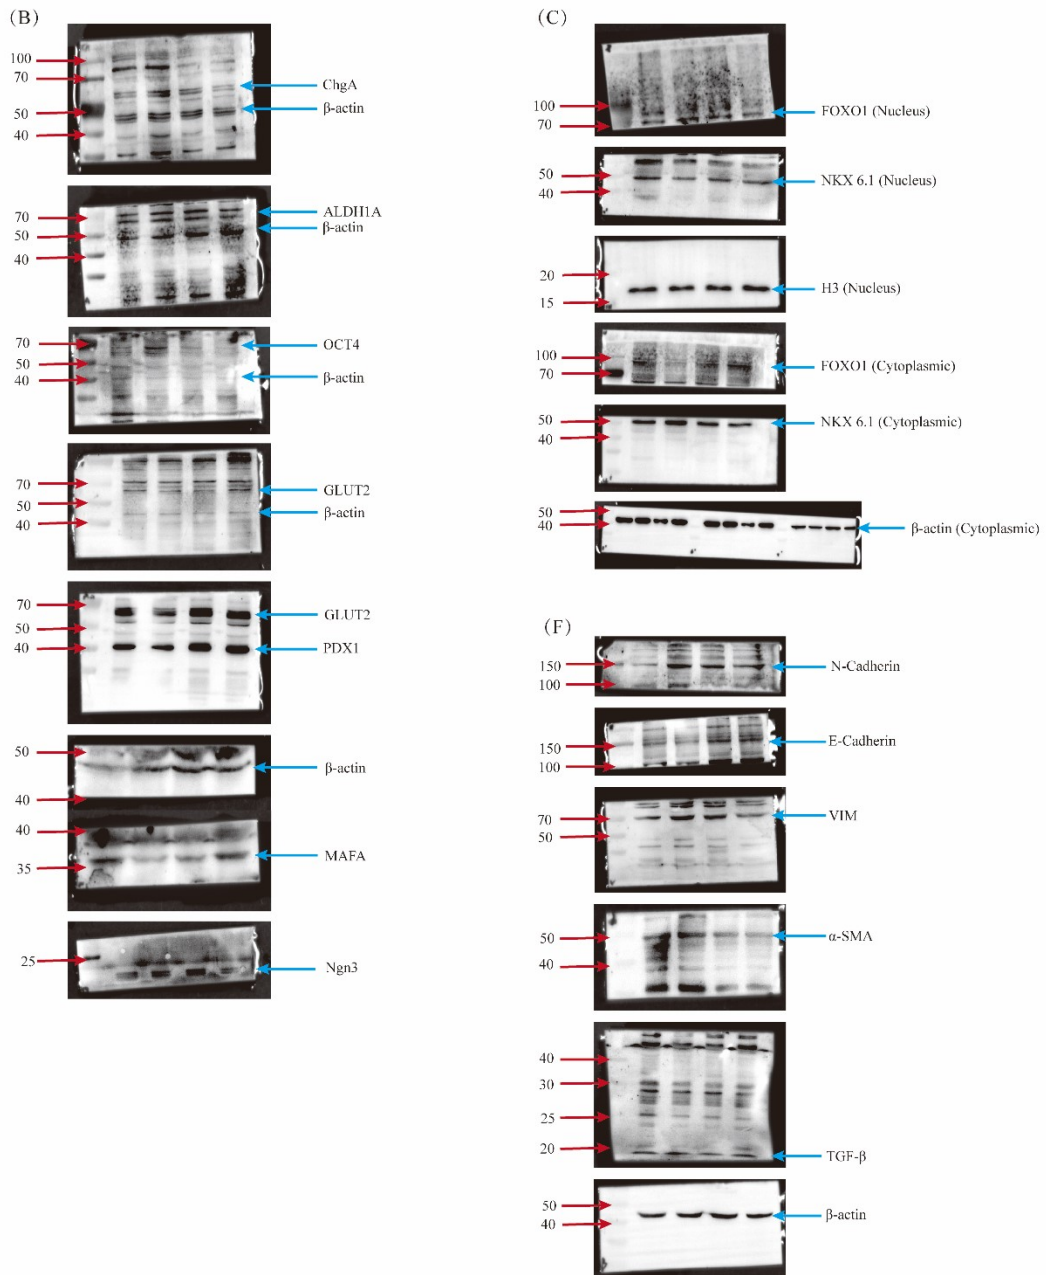

**Fig. 6.** The effect of LGP9 on  $\beta$ -cell differentiation of HG/PA-treated Min6 cells.

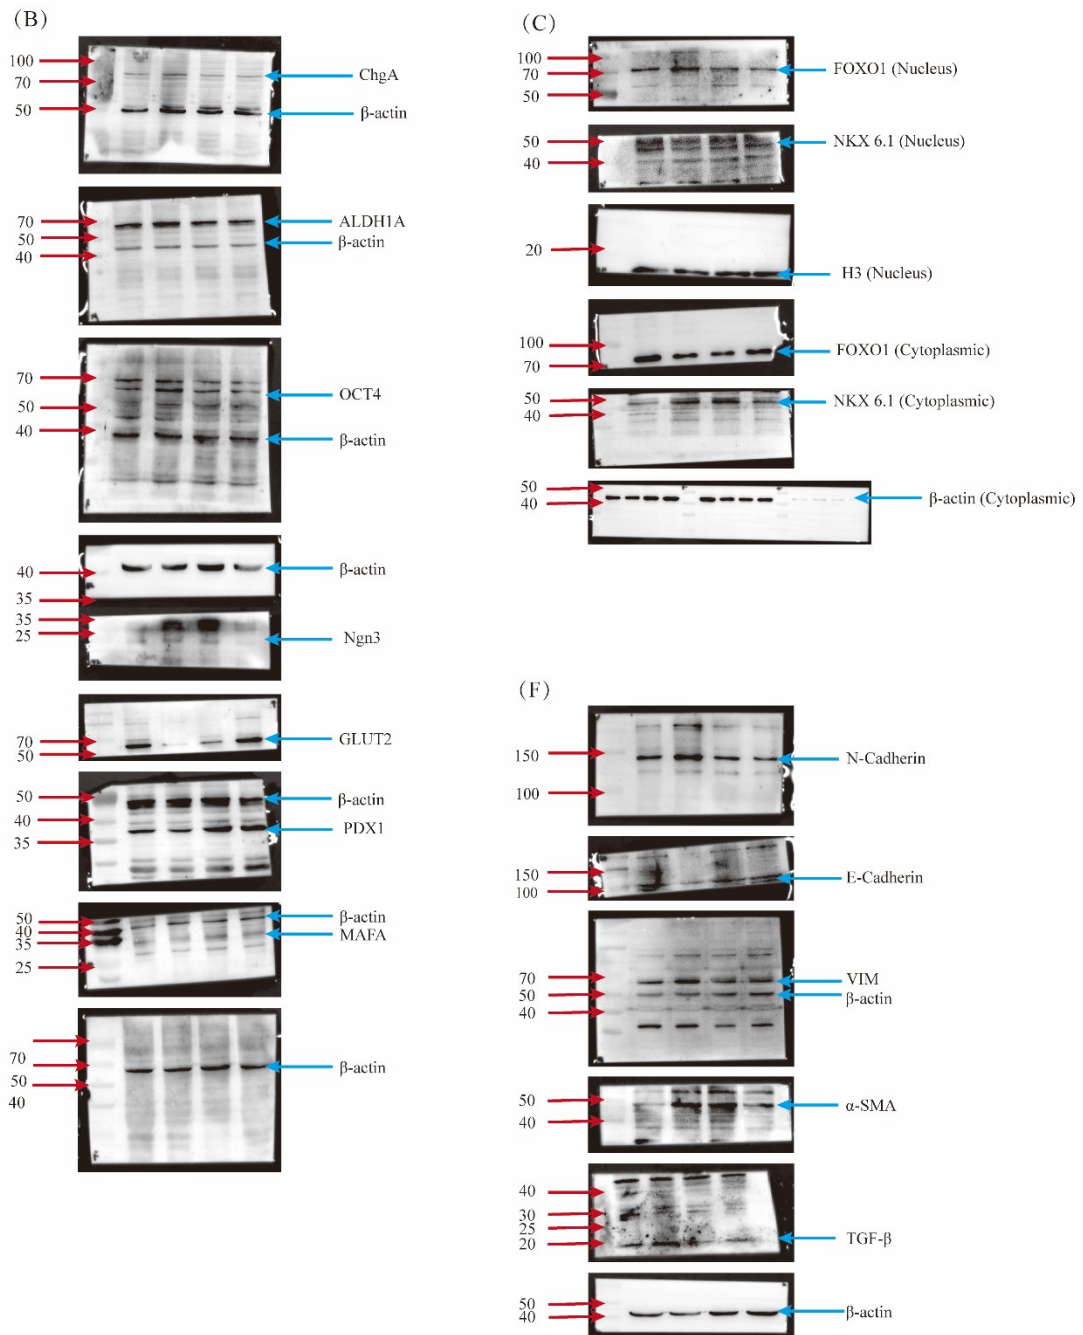

**Fig. 7.** Signaling pathway activated by LGP9 treatment.

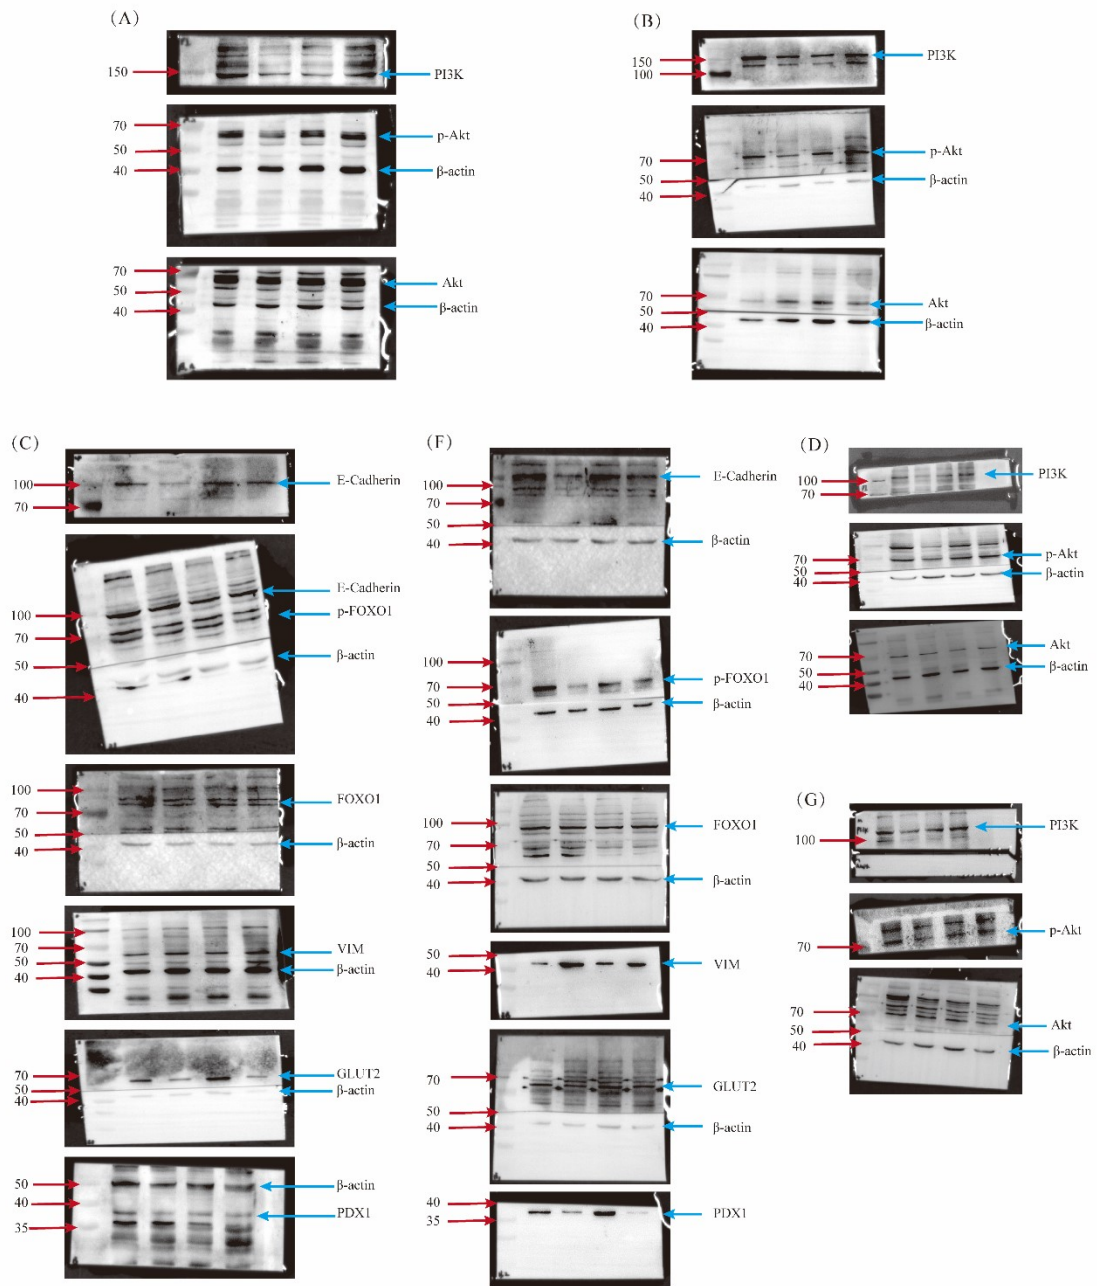

**Fig. 8.** Change of related factors in Rin-m5f cells and Min6 cells via gene silencing of FOXO1.

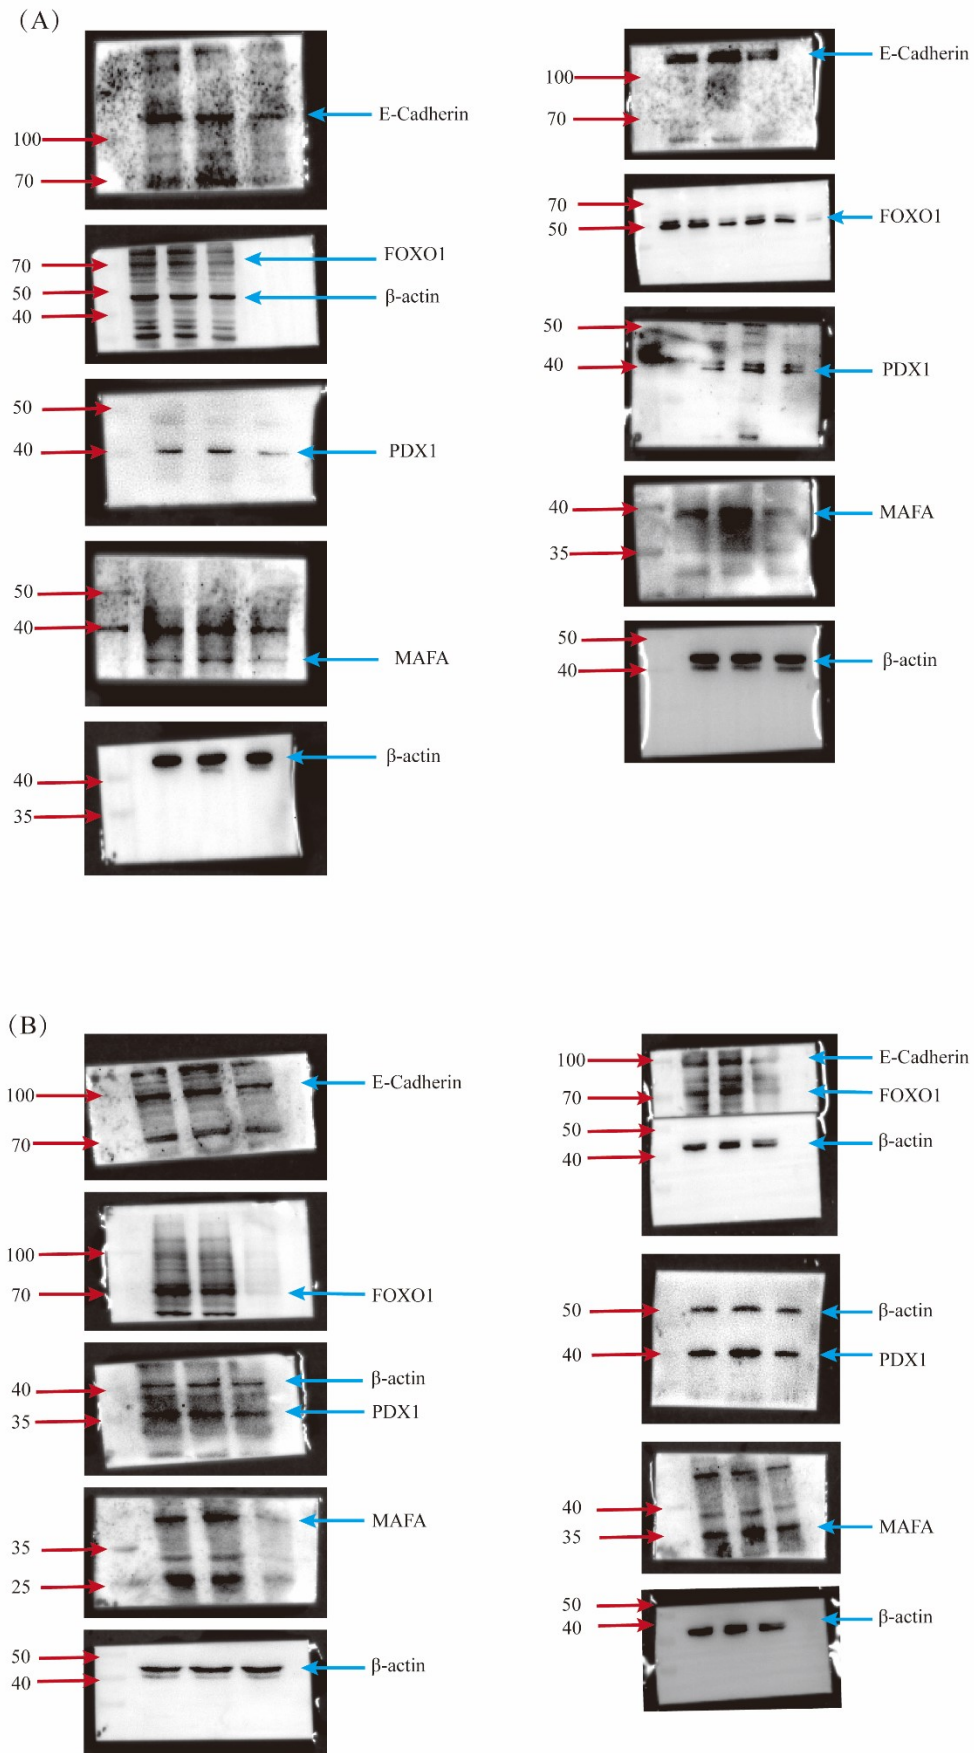

Supplement: d3fo01330h2.pdf [file d3fo01330h2.pdf]
